# Supplementary material for: A Novel Motif in the 3′-UTR of PRRSV-2 Is Critical for Viral Multiplication and Contributes to Enhanced Replication Ability of Highly Pathogenic or L1 PRRSV
Source: MDPI journal article supplement (doi:10.3390/v14020166), 2022-01-18
Supplement: s1 [file s1]

**Supplementary table S1. Information of 765 NA-type PRRSVs in 1992-2019**

| Accession number | Strain name    | Year | Country     | Lineage |
|------------------|----------------|------|-------------|---------|
| KY348849         | 18565-01       | 2001 | USA         | L1      |
| DQ473474         | LMY            | 2002 | South Korea | L1      |
| KY348848         | 18066-04       | 2004 | USA         | L1      |
| JN654459         | NADC30         | 2008 | USA         | L1      |
| JN660150         | NADC31         | 2008 | USA         | L1      |
| KC862579         | DK-2010-10-1-2 | 2010 | Denmark     | L1      |
| KP283404         | Minnesota16    | 2011 | USA         | L1      |
| KU523367         | WUH6           | 2011 | China       | L1      |
| KU131566         | SD11-21-P84    | 2011 | USA         | L1      |
| KU131568         | SD11-21-P100   | 2011 | USA         | L1      |
| KU131557         | SD11-21-P83    | 2011 | USA         | L1      |
| KP283409         | Minnesota7     | 2012 | USA         | L1      |
| KP283411         | Minnesota4     | 2012 | USA         | L1      |
| KP283401         | MN6            | 2012 | USA         | L1      |
| KP283403         | Minnesota17A   | 2012 | USA         | L1      |
| KP283410         | Minnesota5     | 2012 | USA         | L1      |
| KP283405         | Minnesota15    | 2012 | USA         | L1      |
| KP283412         | Minnesota3     | 2012 | USA         | L1      |
| KP283416         | Illinois8      | 2012 | USA         | L1      |
| KP283407         | Minnesota11A   | 2012 | USA         | L1      |
| KP283406         | Minnesota14    | 2012 | USA         | L1      |
| KJ143621         | HENAN-HEB      | 2012 | China       | L1      |
| KP283415         | Iowa12         | 2012 | USA         | L1      |
| KP283413         | Minnesota2     | 2012 | USA         | L1      |
| KP283399         | MN11B          | 2012 | USA         | L1      |
| KP283400         | MN9B           | 2012 | USA         | L1      |
| KP283408         | Minnesota9A    | 2012 | USA         | L1      |
| KP283414         | Minnesota1     | 2012 | USA         | L1      |
| KP283402         | Minnesota17B   | 2013 | USA         | L1      |
| KF555450         | CA-2           | 2013 | South Korea | L1      |
| KF555451         | KNU-12-KJ4     | 2013 | South Korea | L1      |
| KF611905         | HENAN-XINX     | 2013 | China       | L1      |
| KR534893         | OH28372-2013   | 2013 | USA         | L1      |
| KR706343         | JL580          | 2013 | China       | L1      |
| KP860909         | FJZ03          | 2013 | China       | L1      |
| KP860911         | FJW05          | 2013 | China       | L1      |
| MF326988         | IA/2013/ISU-1  | 2013 | USA         | L1      |
| MF326985         | IA/2014/NADC34 | 2014 | USA         | L1      |
| KT257966         | ISU10          | 2014 | USA         | L1      |
| KT257959         | ISU01          | 2014 | USA         | L1      |
| KP861625         | CHsx1401       | 2014 | China       | L1      |
| MF326991         | NC/2014/ISU-4  | 2014 | USA         | L1      |

|          |                |      |       |    |
|----------|----------------|------|-------|----|
| MF326993 | OH/2014/ISU-6  | 2014 | USA   | L1 |
| MF326994 | OH/2014/ISU-7  | 2014 | USA   | L1 |
| MF326992 | IN/2014/ISU-5  | 2014 | USA   | L1 |
| KT257962 | ISU04          | 2014 | USA   | L1 |
| KT257965 | ISU07          | 2014 | USA   | L1 |
| KT257974 | ISU27          | 2014 | USA   | L1 |
| KT257964 | ISU06          | 2014 | USA   | L1 |
| KT257963 | ISU05          | 2014 | USA   | L1 |
| KT257967 | ISU17          | 2014 | USA   | L1 |
| KT257968 | ISU18          | 2014 | USA   | L1 |
| KT257976 | ISU29          | 2014 | USA   | L1 |
| KT257977 | ISU30          | 2014 | USA   | L1 |
| KT257990 | ISU71          | 2014 | USA   | L1 |
| KT257991 | ISU72          | 2014 | USA   | L1 |
| MF326990 | NC/2014/ISU-3  | 2014 | USA   | L1 |
| KT257987 | ISU68          | 2014 | USA   | L1 |
| KT258001 | ISU94          | 2014 | USA   | L1 |
| KT258003 | ISU97          | 2014 | USA   | L1 |
| KT258004 | ISU95          | 2014 | USA   | L1 |
| KT257954 | 21675          | 2014 | USA   | L1 |
| KT257955 | 101416         | 2014 | USA   | L1 |
| KU950372 | HENXX-1        | 2014 | China | L1 |
| KY373214 | JSWA           | 2014 | China | L1 |
| KT257981 | ISU39          | 2014 | USA   | L1 |
| KT257982 | ISU40          | 2014 | USA   | L1 |
| KT258002 | ISU96          | 2014 | USA   | L1 |
| MF766471 | HeN1401        | 2014 | China | L1 |
| MF326995 | IA/2014/ISU-8  | 2014 | USA   | L1 |
| MN046226 | HeNXX-2014-3   | 2014 | China | L1 |
| KT581982 | MN414          | 2014 | USA   | L1 |
| KT257973 | ISU25          | 2014 | USA   | L1 |
| KT257970 | ISU22          | 2014 | USA   | L1 |
| KT257972 | ISU24          | 2014 | USA   | L1 |
| KT257971 | ISU23          | 2014 | USA   | L1 |
| KX169191 | FJ1402         | 2014 | China | L1 |
| KP860910 | FJY04          | 2014 | China | L1 |
| KY412887 | FJL15          | 2014 | China | L1 |
| KY412888 | FJM4           | 2014 | China | L1 |
| MN046225 | Fujian-2014-18 | 2014 | China | L1 |
| MF326989 | IA/2014/ISU-2  | 2014 | USA   | L1 |
| KT257997 | ISU86          | 2014 | USA   | L1 |
| KT257992 | ISU73          | 2014 | USA   | L1 |
| KT257975 | ISU28          | 2014 | USA   | L1 |
| KT258006 | SDSU58         | 2014 | USA   | L1 |

|          |                    |      |             |    |
|----------|--------------------|------|-------------|----|
| KT257956 | 103837             | 2014 | USA         | L1 |
| MN046228 | HeNXX-2014-12      | 2014 | China       | L1 |
| KR534894 | OH155-2015         | 2015 | USA         | L1 |
| KU950371 | HENXC-4            | 2015 | China       | L1 |
| KU950374 | HENZMD-9           | 2015 | China       | L1 |
| KX900392 | HENJY-2            | 2015 | China       | L1 |
| MF326987 | IA/2015/NADC36     | 2015 | USA         | L1 |
| MF326996 | IA/2015/ISU-9      | 2015 | USA         | L1 |
| MF326997 | IA/2015/ISU-10     | 2015 | USA         | L1 |
| MF326999 | NC/2015/ISU-12     | 2015 | USA         | L1 |
| MF327000 | IA/2015/ISU-13     | 2015 | USA         | L1 |
| MF327001 | IA/2015/ISU-14     | 2015 | USA         | L1 |
| MF326986 | IA/2015/NADC35     | 2015 | USA         | L1 |
| KX980392 | SDhz1512           | 2015 | China       | L1 |
| KX815411 | 15HEB1             | 2015 | China       | L1 |
| KX815415 | 15HEN4             | 2015 | China       | L1 |
| MN073090 | PRR223341-S23-L001 | 2015 | USA         | L1 |
| MN073091 | PRR223343-S24-L001 | 2015 | USA         | L1 |
| MN073182 | PRR22334-1         | 2015 | USA         | L1 |
| MK860181 | 394-1              | 2015 | USA         | L1 |
| KU512796 | CA-2-P12           | 2015 | South Korea | L1 |
| KU512797 | CA-2-P22           | 2015 | South Korea | L1 |
| KU512798 | CA-2-P32           | 2015 | South Korea | L1 |
| KU512799 | CA-2-P42           | 2015 | South Korea | L1 |
| KU512800 | CA-2-P52           | 2015 | South Korea | L1 |
| KU512801 | CA-2-P62           | 2015 | South Korea | L1 |
| KU512802 | CA-2-P72           | 2015 | South Korea | L1 |
| KU512803 | CA-2-P82           | 2015 | South Korea | L1 |
| KU512804 | CA-2-P92           | 2015 | South Korea | L1 |
| KU512805 | CA-2-P100          | 2015 | South Korea | L1 |
| KU523366 | WUH5               | 2015 | China       | L1 |
| MF326998 | NC/2015/ISU-11     | 2015 | USA         | L1 |
| KX815413 | 15HEN1             | 2015 | China       | L1 |
| KX815419 | 15JX1              | 2015 | China       | L1 |
| KX815423 | 15LN1              | 2015 | China       | L1 |
| MN073085 | 018560PRRS-S9-L001 | 2015 | USA         | L1 |
| MF375260 | SD-A19             | 2015 | China       | L1 |
| KX758250 | FJXS15             | 2015 | China       | L1 |
| KX815432 | 15ZJ1              | 2015 | China       | L1 |
| KT945017 | HNjz15             | 2015 | China       | L1 |
| KX815428 | 15SC3              | 2015 | China       | L1 |
| KX815425 | 15LN3              | 2015 | China       | L1 |
| MF375261 | SC-d               | 2015 | China       | L1 |
| KY053458 | SDYG1606           | 2016 | China       | L1 |

|          |                     |      |             |    |
|----------|---------------------|------|-------------|----|
| MH651742 | SDQD-1604           | 2016 | China       | L1 |
| KX192112 | NCV-13              | 2016 | USA         | L1 |
| KX192113 | NCV-16              | 2016 | USA         | L1 |
| KX192114 | NCV-17              | 2016 | USA         | L1 |
| KX192115 | NCV-21              | 2016 | USA         | L1 |
| KX192116 | NCV-23              | 2016 | USA         | L1 |
| KX192117 | NCV-24              | 2016 | USA         | L1 |
| KX192118 | NCV-25              | 2016 | USA         | L1 |
| KX192119 | NCV-26              | 2016 | USA         | L1 |
| MN073093 | PRR21032-S1-L001    | 2016 | USA         | L1 |
| MN073094 | brian27950-S16-L001 | 2016 | USA         | L1 |
| MN175677 | PRRSV2/USA/Lab3     | 2016 | USA         | L1 |
| MH588710 | SDbz16-2            | 2016 | China       | L1 |
| MH651740 | HNJYH-1606          | 2016 | China       | L1 |
| MH651736 | CY1-1604            | 2016 | China       | L1 |
| MH651743 | SD-1602             | 2016 | China       | L1 |
| MF196906 | SCnj16              | 2016 | China       | L1 |
| MF766474 | HeN1601             | 2016 | China       | L1 |
| KY363991 | CA-2-MP110          | 2016 | South Korea | L1 |
| KY363992 | CA-2-MP120          | 2016 | South Korea | L1 |
| KX766379 | HNhx                | 2016 | China       | L1 |
| MN046240 | SX1-1607            | 2016 | China       | L1 |
| MN046241 | SX2-1607            | 2016 | China       | L1 |
| MN073087 | 018561PRRS-S10-L001 | 2016 | USA         | L1 |
| KY495780 | JX/CH/2016          | 2016 | China       | L1 |
| KY495781 | SH/CH/2016          | 2016 | China       | L1 |
| MN073103 | 014737Fib-S5-L001   | 2016 | USA         | L1 |
| MN073104 | 014737lu1A-S1-L001  | 2016 | USA         | L1 |
| MN073105 | 014737lu2A-S2-L001  | 2016 | USA         | L1 |
| MN073106 | 014737luC-S4-L001   | 2016 | USA         | L1 |
| MN073107 | 014737Ton-S6-L001   | 2016 | USA         | L1 |
| MN073108 | 014737luB-S3-L001   | 2016 | USA         | L1 |
| MN073109 | br42321BC-S13-L001  | 2016 | USA         | L1 |
| MN073110 | PRR41505-S4-L001    | 2016 | USA         | L1 |
| MN073114 | 52335PRRS-S10-L001  | 2016 | USA         | L1 |
| MN073115 | 5988810PRRS-S5-L001 | 2016 | USA         | L1 |
| MH651737 | CY2-1604            | 2016 | China       | L1 |
| KX758249 | FJWQ16              | 2016 | China       | L1 |
| MH651744 | SD53-1603           | 2016 | China       | L1 |
| MH651745 | SD99-1606           | 2016 | China       | L1 |
| MN046222 | HLJ-80              | 2016 | China       | L1 |
| MH651746 | SDQZ-1609           | 2016 | China       | L1 |
| MH651739 | HBFL-1604           | 2016 | China       | L1 |
| KY041782 | HENXX-8             | 2016 | China       | L1 |

|          |                            |      |       |    |
|----------|----------------------------|------|-------|----|
| MH651741 | LNCH-1604                  | 2016 | China | L1 |
| MH651748 | TJZH-1607                  | 2016 | China | L1 |
| MH651738 | HNJYF-1606                 | 2016 | China | L1 |
| MF526964 | USA/IN_Purdue/1490-LN/2017 | 2017 | USA   | L1 |
| MG913987 | LNWK130                    | 2017 | China | L1 |
| MH068878 | SD17-38                    | 2017 | China | L1 |
| MH121061 | SD17-36                    | 2017 | China | L1 |
| MH167388 | QHD3                       | 2017 | China | L1 |
| MG914067 | SCcd17                     | 2017 | China | L1 |
| MN073092 | 9982R-S5-L001              | 2017 | USA   | L1 |
| MN073097 | 5606R-S6-L001              | 2017 | USA   | L1 |
| MN073098 | PRR312824-S16-L001         | 2017 | USA   | L1 |
| MN073100 | PRR312826-S18-L001         | 2017 | USA   | L1 |
| MF526965 | USA/IN_Purdue/14067/2017   | 2017 | USA   | L1 |
| MN046224 | HEB-108                    | 2017 | China | L1 |
| MN073086 | 1924R-S2-L001              | 2017 | USA   | L1 |
| MN073088 | 1923R-S1-L001              | 2017 | USA   | L1 |
| MN073089 | 9337R-S4-L001              | 2017 | USA   | L1 |
| MN073095 | 20170210381-S2-L001        | 2017 | USA   | L1 |
| MN073113 | PRR312823-S15-L001         | 2017 | USA   | L1 |
| MN073118 | PRR027981-S25-L001         | 2017 | USA   | L1 |
| MN073119 | 5381R-S5-L001              | 2017 | USA   | L1 |
| MN073120 | 5383R-S7-L001              | 2017 | USA   | L1 |
| MN073125 | PRR312827-S19-L001         | 2017 | USA   | L1 |
| MN073111 | PRR027983-S27-L001         | 2017 | USA   | L1 |
| MN073112 | PRR027984-S28-L001         | 2017 | USA   | L1 |
| MG844181 | HB17A                      | 2017 | China | L1 |
| MH500776 | NADC30-2017                | 2017 | China | L1 |
| MG687491 | QHD1                       | 2017 | China | L1 |
| MK396376 | GDsf1707                   | 2017 | China | L1 |
| MK396377 | GDsf1710                   | 2017 | China | L1 |
| MK396378 | GDsf1711                   | 2017 | China | L1 |
| MN073123 | PRR312821-S13-L001         | 2017 | USA   | L1 |
| MN073124 | PRR312822-S14-L001         | 2017 | USA   | L1 |
| MH167387 | QHD2                       | 2017 | China | L1 |
| MG860516 | LNWK96                     | 2017 | China | L1 |
| MH078490 | SCN17                      | 2017 | China | L1 |
| MG011719 | FJDJQ-2017                 | 2017 | China | L1 |
| MN073096 | PRRSV-2018014208-S12       | 2018 | USA   | L1 |
| MN073102 | 7705R-S1                   | 2018 | USA   | L1 |
| MN073174 | PRRSV-2018017613-S8        | 2018 | USA   | L1 |
| MK450333 | CH-WH-2019-1               | 2018 | China | L1 |
| MK202794 | FJ0908                     | 2018 | China | L1 |
| MH370474 | CH/2018/NCV-Anheal-1       | 2018 | China | L1 |

|          |               |      |       |    |
|----------|---------------|------|-------|----|
| MN046243 | HLJ-DZD4-1805 | 2018 | China | L1 |
| MN073084 | 2385R-S13     | 2018 | USA   | L1 |
| MK396379 | GDsf1802      | 2018 | China | L1 |
| MK396380 | GDsf1804      | 2018 | China | L1 |
| MN046230 | HLJWK108-1711 | 2018 | China | L1 |
| MN073081 | 0752R-S4      | 2018 | USA   | L1 |
| MN073083 | 7498R-S10     | 2018 | USA   | L1 |
| MK396381 | GDsf1806      | 2018 | China | L1 |
| MK396382 | GDsf1807      | 2018 | China | L1 |
| MK396383 | GDsf1808      | 2018 | China | L1 |
| MK396384 | GDsf1809      | 2018 | China | L1 |
| MN073172 | 1504R-S1      | 2018 | USA   | L1 |
| MN073122 | 6950-1R-S2    | 2018 | USA   | L1 |
| MK796164 | IA76950-WT    | 2018 | USA   | L1 |
| MN046229 | HeB-239       | 2018 | China | L1 |
| MN073127 | 7684R-S11     | 2018 | USA   | L1 |
| MK144543 | SCya18        | 2018 | China | L1 |
| DQ176019 | MN184A        | na   | USA   | L1 |
| EF484031 | MN184         | na   | USA   | L1 |
| EF488739 | MN184C        | na   | USA   | L1 |
| DQ176020 | MN184B        | na   | USA   | L1 |
| GQ914997 | SD1-100       | na   | China | L1 |
| JX258843 | SD23983       | na   | USA   | L1 |
| GU232736 | TP P60        | na   | China | L1 |
| GU232737 | TP P90        | na   | China | L1 |
| KF287133 | HK2           | 2003 | China | L3 |
| KF287138 | HK11          | 2004 | China | L3 |
| KF287142 | HK15          | 2004 | China | L3 |
| KF287137 | HK9           | 2004 | China | L3 |
| KF287135 | HK6           | 2004 | China | L3 |
| JQ743666 | QY2010        | 2010 | China | L3 |
| JN662424 | GM2           | 2011 | China | L3 |
| JQ308798 | QYYZ          | 2011 | China | L3 |
| KY373215 | HiNZWQ        | 2014 | China | L3 |
| KU978619 | GD-KP         | 2015 | China | L3 |
| KX621003 | GDsg          | 2015 | China | L3 |
| KX689233 | XJzx1-2015    | 2015 | China | L3 |
| KT945018 | HNyc15        | 2015 | China | L3 |
| MH236426 | ZJnb16-2      | 2016 | China | L3 |
| KY745901 | GDYDZZZ       | 2016 | China | L3 |
| MF196905 | SCcd16        | 2016 | China | L3 |
| MK144542 | GZgy17        | 2017 | China | L3 |
| MH324400 | SCya17        | 2017 | China | L3 |
| MG011718 | FJLIUY-2017   | 2017 | China | L3 |

|           |                          |      |             |    |
|-----------|--------------------------|------|-------------|----|
| MN046242  | LN-DB87                  | 2018 | China       | L3 |
| KP998476  | FJFS                     | na   | China       | L3 |
| AB288356  | EDRD-1                   | 1992 | Japan       | L4 |
| KU131564  | SD95-47_P83              | 1995 | USA         | L5 |
| KC469618  | SD95-21                  | 1995 | USA         | L5 |
| KC862576  | DK-1997-19407B           | 1997 | Denmark     | L5 |
| AF325691  | NVSL_97-7985_IA_1-4-2    | 1997 | USA         | L5 |
| NC_001961 | 16244B                   | 1997 | USA         | L5 |
| AY585241  | PL97-1                   | 1997 | South Korea | L5 |
| AY612613  | PL97-1/LP1               | 1997 | South Korea | L5 |
| KU131562  | ND99-14_P83              | 1999 | USA         | L5 |
| KU131567  | ND99-14_P84              | 1999 | USA         | L5 |
| KU131569  | ND99-14_P100             | 1999 | USA         | L5 |
| KY348851  | 43807-00                 | 2000 | USA         | L5 |
| KY348853  | 3805-00                  | 2000 | USA         | L5 |
| KU131561  | SD02-10_P83              | 2002 | USA         | L5 |
| FJ899592  | Clone20                  | 2003 | China       | L5 |
| KC862584  | DK-2003-2-3              | 2003 | Denmark     | L5 |
| KF287141  | HK14                     | 2004 | China       | L5 |
| KC862578  | DK-2004-1-7-PI           | 2004 | Denmark     | L5 |
| KU131559  | SD04-89_P83              | 2004 | USA         | L5 |
| KC862585  | DK-2004-2-1              | 2004 | Denmark     | L5 |
| JN864948  | DY                       | 2007 | China       | L5 |
| KC862582  | DK-2008-10-1-3           | 2008 | Denmark     | L5 |
| KC862581  | DK-2010-10-2-1           | 2010 | Denmark     | L5 |
| KC862580  | DK-2010-10-7-1           | 2010 | Denmark     | L5 |
| KC862583  | DK-2010-10-4-1           | 2010 | Denmark     | L5 |
| KF183946  | DK-2010-10-13-1          | 2010 | Denmark     | L5 |
| JQ087873  | A2MC2-2010               | 2010 | USA         | L5 |
| KC862577  | DK-2011-030311-1         | 2011 | Denmark     | L5 |
| KF183947  | DK-2011-88005-A8-PI      | 2011 | Denmark     | L5 |
| JX857698  | YN-2011                  | 2011 | China       | L5 |
| KF771273  | GZ1101                   | 2011 | China       | L5 |
| KC862575  | DK-2012-01-11-3          | 2012 | Denmark     | L5 |
| KM514315  | PRRSV-2_Hungary_102_2012 | 2012 | Hungary     | L5 |
| KX462792  | A2MC2-2012               | 2012 | USA         | L5 |
| KC445138  | HZ-31                    | 2012 | China       | L5 |
| KT257945  | 14-64                    | 2014 | USA         | L5 |
| KT257946  | 14-67                    | 2014 | USA         | L5 |
| KT257947  | 14-68                    | 2014 | USA         | L5 |
| KT257944  | 14-60                    | 2014 | USA         | L5 |
| KU318406  | A2MC2-P90                | 2015 | USA         | L5 |
| MN073134  | PRR715665-S8-L001        | 2015 | USA         | L5 |
| MN073135  | PRR715666-S9-L001        | 2015 | USA         | L5 |

|          |                      |      |          |    |
|----------|----------------------|------|----------|----|
| MN073133 | 7473PRRS-S3-L001     | 2016 | USA      | L5 |
| MN073139 | 7471PRRS-S1-L001     | 2016 | USA      | L5 |
| MN073136 | 397081R-S16-L001     | 2017 | USA      | L5 |
| MN073137 | 397082R-S17-L001     | 2017 | USA      | L5 |
| MN073140 | lung23199-S4-L001    | 2017 | USA      | L5 |
| MN073143 | PRR146795SA-S1-L001  | 2017 | USA      | L5 |
| MN073145 | PRR1467916SA-S2-L001 | 2017 | USA      | L5 |
| MN073146 | PRR1467916SQ-S4-L001 | 2017 | USA      | L5 |
| MN073147 | PRRS35752R-S7-L001   | 2017 | USA      | L5 |
| MN073148 | PRR02760-S1-L001     | 2017 | USA      | L5 |
| MN073149 | PRR02760Q-S15-L001   | 2017 | USA      | L5 |
| MN046233 | Liaoning-2017-6      | 2017 | China    | L5 |
| MN073130 | 4115R-S1             | 2018 | USA      | L5 |
| MN073131 | 1041R-S1             | 2018 | USA      | L5 |
| MN073132 | 4512R-S7-L001        | 2018 | USA      | L5 |
| DQ217415 | VR-2332-pVR-V7       | na   | USA      | L5 |
| KP998474 | FJSD                 | na   | China    | L5 |
| AF066183 | RespPRRS MLV         | na   | USA      | L5 |
| DQ176021 | VR2332 V7            | na   | USA      | L5 |
| DQ459471 | S1                   | na   | China    | L5 |
| EF484033 | Ingelvac MLV         | na   | USA      | L5 |
| FJ524376 | VR-2332-V7-HA-myc    | na   | USA      | L5 |
| FJ524377 | VR-2332-pV7-myc      | na   | USA      | L5 |
| DQ056373 | 01NP1.2              | na   | Thailand | L5 |
| AF159149 | MLV ResPRRS/Repro    | na   | na       | L5 |
| AF176348 | PA8                  | na   | Canada   | L5 |
| AF331831 | BJ-4                 | na   | China    | L5 |
| AY150564 | VR-2332              | na   | USA      | L5 |
| EU360128 | rV68                 | na   | China    | L5 |
| EU360129 | rV63                 | na   | China    | L5 |
| EU880441 | GS2002               | na   | China    | L5 |
| EU880442 | GS2003               | na   | China    | L5 |
| EU880443 | GS2004               | na   | China    | L5 |
| FJ175687 | PRRSV01              | na   | China    | L5 |
| FJ175688 | PRRSV02              | na   | China    | L5 |
| FJ175689 | PRRSV03              | na   | China    | L5 |
| AY457635 | HN1                  | na   | China    | L5 |
| EF153486 | CC-1                 | na   | China    | L5 |
| AF494042 | P129                 | na   | USA      | L6 |
| MN073129 | 41761R-S15-L001      | 2018 | USA      | L7 |
| AF184212 | SP                   | na   | na       | L7 |
| DQ779791 | Prime Pac            | na   | USA      | L7 |
| MK837936 | NADC20               | 1996 | USA      | L8 |
| JN654458 | SDSU73               | 1996 | USA      | L8 |



|          |               |      |          |    |
|----------|---------------|------|----------|----|
| AY262352 | HB-2(sh)/2002 | 2002 | China    | L8 |
| EU360130 | HB-1/3.9      | 2002 | China    | L8 |
| KF287132 | HK1           | 2003 | China    | L8 |
| KF287136 | HK7           | 2004 | China    | L8 |
| FJ536165 | NB/04         | 2004 | China    | L8 |
| KF287139 | HK12          | 2004 | China    | L8 |
| KF287140 | HK13          | 2005 | China    | L8 |
| KJ541663 | GZ106         | 2005 | China    | L8 |
| EU864232 | SHB           | 2005 | China    | L8 |
| KU131558 | MN05-68_P83   | 2005 | USA      | L8 |
| MF370557 | FZ06A         | 2006 | China    | L8 |
| EF641008 | JXwn06        | 2006 | China    | L8 |
| EU144079 | SY0608        | 2006 | China    | L8 |
| EU708726 | JX143         | 2006 | China    | L8 |
| EU860248 | TJ            | 2006 | China    | L8 |
| EU864233 | TP            | 2006 | China    | L8 |
| EU880432 | JX2006        | 2006 | China    | L8 |
| FJ797690 | HN-HW         | 2006 | China    | L8 |
| MF187956 | rJXwn06       | 2006 | China    | L8 |
| FJ950744 | BJSY-1        | 2007 | China    | L8 |
| JX317648 | HV            | 2007 | China    | L8 |
| JX512910 | SRV07         | 2007 | Viet Nam | L8 |
| EF488048 | pJX143        | 2007 | China    | L8 |
| EU825723 | BJ            | 2007 | China    | L8 |
| EU825724 | GD-825724     | 2007 | China    | L8 |
| EU860249 | NM1           | 2007 | China    | L8 |
| EU864231 | CG            | 2007 | China    | L8 |
| EU880433 | GD2007        | 2007 | China    | L8 |
| EU880434 | SX2007        | 2007 | China    | L8 |
| EU880437 | HN2007        | 2007 | China    | L8 |
| FJ393456 | 07NM          | 2007 | China    | L8 |
| FJ393457 | 07HEN         | 2007 | China    | L8 |
| FJ393458 | 07HEBTJ       | 2007 | China    | L8 |
| FJ393459 | 07BJ          | 2007 | China    | L8 |
| FJ950747 | BJSD          | 2007 | China    | L8 |
| GQ374441 | GDQJ          | 2007 | China    | L8 |
| GU461292 | AH0701        | 2007 | China    | L8 |
| HM011104 | BJSY07        | 2007 | China    | L8 |
| JN387271 | GDQY1         | 2007 | China    | L8 |
| KX766378 | HN07-1        | 2007 | China    | L8 |
| FJ950745 | BJBLZ         | 2007 | China    | L8 |
| EU624117 | XH-GD         | 2007 | China    | L8 |
| GQ351601 | BJ0706        | 2007 | China    | L8 |
| HQ401282 | Shaanxi-2     | 2007 | China    | L8 |

|          |               |      |       |    |
|----------|---------------|------|-------|----|
| FJ950746 | BJPG          | 2007 | China | L8 |
| GU454850 | GDQY2         | 2007 | China | L8 |
| GU169411 | 08HuN         | 2008 | China | L8 |
| EU880431 | GS2008        | 2008 | China | L8 |
| EU880435 | YN2008        | 2008 | China | L8 |
| EU880436 | XL2008        | 2008 | China | L8 |
| FJ889129 | CBB-1-F3      | 2008 | China | L8 |
| FJ889130 | CWZ-1-F3      | 2008 | China | L8 |
| GQ359108 | SD-CXA/2008   | 2008 | China | L8 |
| GQ374442 | GDBY1         | 2008 | China | L8 |
| GQ499193 | JXM20         | 2008 | China | L8 |
| GQ499194 | JXM40         | 2008 | China | L8 |
| GQ499195 | JXM60         | 2008 | China | L8 |
| GQ499196 | JXM80         | 2008 | China | L8 |
| HM853673 | WUH3          | 2008 | China | L8 |
| KP771754 | NVDC-HeB-2008 | 2008 | China | L8 |
| KP771755 | NVDC-CQ-2008  | 2008 | China | L8 |
| KP771779 | NVDC-NM-2008  | 2008 | China | L8 |
| KT033733 | QH-1(sh)      | 2008 | China | L8 |
| KU201579 | QH-08         | 2008 | China | L8 |
| HM016158 | JN-HS         | 2008 | China | L8 |
| KX650082 | RVB-581       | 2008 | China | L8 |
| HQ315836 | NT0801        | 2008 | China | L8 |
| KJ523894 | NT0801_P10    | 2008 | China | L8 |
| GU168569 | 08SDWF        | 2008 | China | L8 |
| GU232735 | KP            | 2008 | China | L8 |
| GU232738 | YN9           | 2008 | China | L8 |
| HM016159 | ZP-1          | 2009 | China | L8 |
| JF800911 | ZCYZ          | 2009 | China | L8 |
| FJ895329 | SX2009        | 2009 | China | L8 |
| GU143913 | GD-143913     | 2009 | China | L8 |
| HM189676 | HLJHL         | 2009 | China | L8 |
| HQ315835 | BB0907        | 2009 | China | L8 |
| HQ315837 | SY0909        | 2009 | China | L8 |
| HQ843178 | HLJ-09        | 2009 | China | L8 |
| HQ843179 | HLM-09        | 2009 | China | L8 |
| HQ843180 | SD-09         | 2009 | China | L8 |
| HQ843181 | SX-09         | 2009 | China | L8 |
| JF268672 | 09SC          | 2009 | China | L8 |
| JF268673 | 09HUN1        | 2009 | China | L8 |
| JF268676 | 09BJ          | 2009 | China | L8 |
| JF268678 | 09SD          | 2009 | China | L8 |
| JF268679 | 09HEB         | 2009 | China | L8 |
| JF268680 | 09HEN2        | 2009 | China | L8 |

|          |                          |      |          |    |
|----------|--------------------------|------|----------|----|
| JF268682 | 09HUB1                   | 2009 | China    | L8 |
| JF268683 | 09HUB2                   | 2009 | China    | L8 |
| JF268684 | 09HEN1                   | 2009 | China    | L8 |
| GU168568 | 09HUB5                   | 2009 | China    | L8 |
| GU168567 | 09HUB7                   | 2009 | China    | L8 |
| JF268674 | 09HUN2                   | 2009 | China    | L8 |
| JF268677 | 09DB1                    | 2009 | China    | L8 |
| JF268681 | 09DB2                    | 2009 | China    | L8 |
| KJ523895 | NT0801_P30               | 2009 | China    | L8 |
| JF268675 | 09JS                     | 2009 | China    | L8 |
| JQ804986 | JXA1-P170                | 2009 | China    | L8 |
| KC422725 | JXA1-P100                | 2009 | China    | L8 |
| KC422726 | JXA1-P110                | 2009 | China    | L8 |
| KC422727 | JXA1-P120                | 2009 | China    | L8 |
| KC422728 | JXA1-P130                | 2009 | China    | L8 |
| KC422729 | JXA1-P140                | 2009 | China    | L8 |
| KC422730 | JXA1-P150                | 2009 | China    | L8 |
| KC422731 | JXA1-P160                | 2009 | China    | L8 |
| JF748717 | YD                       | 2009 | China    | L8 |
| JN836553 | SCwhn09CD                | 2009 | China    | L8 |
| JX192633 | 10GZ-GD                  | 2010 | China    | L8 |
| JX317649 | JX                       | 2010 | China    | L8 |
| KF735060 | HP/Thailand/19500LL/2010 | 2010 | Thailand | L8 |
| JX215553 | 10HD-GD                  | 2010 | China    | L8 |
| JN387272 | GDQY1VP65                | 2010 | China    | L8 |
| JN387273 | GDQY1VP80                | 2010 | China    | L8 |
| JQ663540 | 10-10JX                  | 2010 | China    | L8 |
| JQ663541 | 10-10BJ-1                | 2010 | China    | L8 |
| JQ663542 | 10-10BJ-3                | 2010 | China    | L8 |
| JQ663543 | 10-10BJ-2                | 2010 | China    | L8 |
| JQ663544 | 10-10BJ-4                | 2010 | China    | L8 |
| JQ663545 | 10-10BJ-5                | 2010 | China    | L8 |
| JQ663546 | 10-10FUJ-1               | 2010 | China    | L8 |
| JQ663547 | 10-10FUJ-2               | 2010 | China    | L8 |
| JQ663548 | 10-10FUJ-3               | 2010 | China    | L8 |
| JQ663549 | 10-10FUJ-4               | 2010 | China    | L8 |
| JQ663550 | 10-10FUJ-5               | 2010 | China    | L8 |
| JQ663551 | 10-10HEB-1               | 2010 | China    | L8 |
| JQ663552 | 10-10HEB-2               | 2010 | China    | L8 |
| JQ663553 | 10-10HEB-3               | 2010 | China    | L8 |
| JQ663555 | 10-10SD                  | 2010 | China    | L8 |
| JQ663556 | 10-10QN                  | 2010 | China    | L8 |
| JQ663557 | 10-LW1-13                | 2010 | China    | L8 |
| JQ663558 | 10-10GX-1                | 2010 | China    | L8 |

|          |                |      |       |    |
|----------|----------------|------|-------|----|
| JQ663559 | 10-10GX-2      | 2010 | China | L8 |
| JQ663560 | 10-10GX-3      | 2010 | China | L8 |
| JQ663561 | 10-10GX-4      | 2010 | China | L8 |
| JQ663562 | 10-10GX-5      | 2010 | China | L8 |
| JQ663563 | 10-LW2-6       | 2010 | China | L8 |
| JQ663564 | 10-LW3-7       | 2010 | China | L8 |
| JQ663565 | 10-10LW5-1     | 2010 | China | L8 |
| JQ663566 | 10-LW6-6       | 2010 | China | L8 |
| JQ663567 | 10-LW7-1       | 2010 | China | L8 |
| JQ663568 | 10-LW8-1       | 2010 | China | L8 |
| JN626287 | BH58/10        | 2010 | Laos  | L8 |
| JF796180 | FS             | 2010 | China | L8 |
| JX192637 | 10SJ-GD        | 2010 | China | L8 |
| JX192638 | 10SS-GD        | 2010 | China | L8 |
| JX192634 | 10FS-GD        | 2010 | China | L8 |
| JX192636 | 10BY-GD        | 2010 | China | L8 |
| JX215552 | 10QY-GD        | 2010 | China | L8 |
| JX192639 | 10ZQ-GD        | 2010 | China | L8 |
| KJ523896 | NT0801_P50     | 2010 | China | L8 |
| KJ855518 | Shanxi-6       | 2010 | China | L8 |
| JF748718 | DC             | 2010 | China | L8 |
| JX912249 | GX1003         | 2010 | China | L8 |
| JX192635 | 10FS1-GD       | 2010 | China | L8 |
| JX192632 | 10HN-GD        | 2010 | China | L8 |
| JN387274 | GDQY1VP100     | 2011 | China | L8 |
| JQ326271 | WUH4           | 2011 | China | L8 |
| JQ715698 | NVDC-JS2-2011  | 2011 | China | L8 |
| KC527830 | GD-2011        | 2011 | China | L8 |
| KF751237 | BJ1102         | 2011 | China | L8 |
| KP771746 | NVDC-CQ1-2011  | 2011 | China | L8 |
| KP771748 | NVDC-BJ2-2011  | 2011 | China | L8 |
| KP771749 | NVDC-HeB1-2011 | 2011 | China | L8 |
| KP771765 | NVDC-HeB2-2011 | 2011 | China | L8 |
| KP771766 | NVDC-GD-2011   | 2011 | China | L8 |
| KP771767 | NVDC-YN-2011   | 2011 | China | L8 |
| KP771774 | NVDC-CQ3-2011  | 2011 | China | L8 |
| KP771778 | NVDC-BJ1-2011  | 2011 | China | L8 |
| KP793736 | GD-HD          | 2011 | China | L8 |
| JX878380 | SDA3           | 2011 | China | L8 |
| JX215551 | 11FS11-GD      | 2011 | China | L8 |
| JX215554 | 11FS12-GD      | 2011 | China | L8 |
| JX235366 | 11SH1-GD       | 2011 | China | L8 |
| JX235370 | 11GZ-GD        | 2011 | China | L8 |
| JX679179 | HH08           | 2011 | China | L8 |

|          |                |      |       |    |
|----------|----------------|------|-------|----|
| KF751238 | LN1101         | 2011 | China | L8 |
| JX880029 | NJ-1106        | 2011 | China | L8 |
| KJ523897 | NT0801_P80     | 2011 | China | L8 |
| JX878379 | SDA2           | 2011 | China | L8 |
| JX217036 | 11NZ-GD        | 2011 | China | L8 |
| JX235367 | 11XX-GD        | 2011 | China | L8 |
| JX235365 | 11SH-GD        | 2011 | China | L8 |
| JQ715697 | NVDC-GD2-2011  | 2011 | China | L8 |
| JX087437 | SD16           | 2012 | China | L8 |
| KF678434 | SH1211         | 2012 | China | L8 |
| MF689000 | HeN1201        | 2012 | China | L8 |
| JQ663554 | 10-10JL        | 2012 | China | L8 |
| JX177644 | JL-04/12       | 2012 | China | L8 |
| KF815525 | XJu-1          | 2012 | China | L8 |
| KP771747 | NVDC-CQ1-2012  | 2012 | China | L8 |
| KP771757 | NVDC-BJ8-2012  | 2012 | China | L8 |
| KP771758 | NVDC-BJ7-2012  | 2012 | China | L8 |
| KP771759 | NVDC-BJ6-2012  | 2012 | China | L8 |
| KP771760 | NVDC-BJ5-2012  | 2012 | China | L8 |
| KP771761 | NVDC-BJ4-2012  | 2012 | China | L8 |
| KP771763 | NVDC-BJ2-2012  | 2012 | China | L8 |
| KP771764 | NVDC-BJ1-2012  | 2012 | China | L8 |
| KP771769 | NVDC-SD1-2012  | 2012 | China | L8 |
| KP771770 | NVDC-HuN-2011  | 2012 | China | L8 |
| KP771771 | NVDC-HeN-2012  | 2012 | China | L8 |
| KP771772 | NVDC-HeB2-2012 | 2012 | China | L8 |
| KP771775 | NVDC-CQ3-2012  | 2012 | China | L8 |
| KP771776 | NVDC-CQ2-2012  | 2012 | China | L8 |
| KP771777 | NVDC-CQ4-2012  | 2012 | China | L8 |
| KP771756 | NVDC-BJ9-2012  | 2012 | China | L8 |
| KP771762 | NVDC-BJ3-2012  | 2012 | China | L8 |
| KP771768 | NVDC-SD2-2012  | 2012 | China | L8 |
| KM189443 | SC2012         | 2012 | China | L8 |
| KP771773 | NVDC-HeB1-2012 | 2012 | China | L8 |
| MF766470 | HeN1301        | 2013 | China | L8 |
| KJ002451 | HeNan-A1       | 2013 | China | L8 |
| KJ002452 | HeNan-A2       | 2013 | China | L8 |
| KJ019330 | Henan-A3       | 2013 | China | L8 |
| KJ534539 | Henan-A4       | 2013 | China | L8 |
| KJ534540 | Henan-A5       | 2013 | China | L8 |
| KJ534541 | Henan-A6       | 2013 | China | L8 |
| KJ534542 | Henan-A7       | 2013 | China | L8 |
| KJ534543 | Henan-A8       | 2013 | China | L8 |
| KJ546412 | HeNan-A9       | 2013 | China | L8 |

|          |                  |      |       |    |
|----------|------------------|------|-------|----|
| KJ609516 | MY-486           | 2013 | China | L8 |
| KJ609517 | MY-376           | 2013 | China | L8 |
| KP771740 | NVDC-SXJC-2013   | 2013 | China | L8 |
| KP771742 | NVDC-HBCZ-2013   | 2013 | China | L8 |
| KP771744 | NVDC-HeB2-2013   | 2013 | China | L8 |
| KP771745 | NVDC-HeB1-2013   | 2013 | China | L8 |
| KP771750 | NVDC-MD2-2013    | 2013 | China | L8 |
| KP771751 | NVDC-MD1-2013    | 2013 | China | L8 |
| KP771752 | HEB_20130008-14  | 2013 | China | L8 |
| KP771753 | HEB_20130008-13  | 2013 | China | L8 |
| KP890337 | BJ-F20           | 2013 | China | L8 |
| KP890338 | BJ-F40           | 2013 | China | L8 |
| KP890339 | BJ-F60           | 2013 | China | L8 |
| KP890340 | BJ-F80           | 2013 | China | L8 |
| KP890341 | BJ-F110          | 2013 | China | L8 |
| KP890342 | BJ-F150          | 2013 | China | L8 |
| KT180169 | XF1129           | 2013 | China | L8 |
| KT351739 | HLJA1            | 2013 | China | L8 |
| KT351740 | HLJB1            | 2013 | China | L8 |
| KJ591659 | HEB-2013         | 2013 | China | L8 |
| KP771741 | NVDC-SDXX-2013   | 2013 | China | L8 |
| KP771743 | NVDC-BJPG-2013   | 2013 | China | L8 |
| KT022072 | HNyc13           | 2013 | China | L8 |
| KU950373 | HENZK-1          | 2014 | China | L8 |
| KJ819934 | Henan-A12        | 2014 | China | L8 |
| KJ819936 | Henan-A14        | 2014 | China | L8 |
| KM453698 | BB0907-s34       | 2014 | China | L8 |
| KM453699 | BB0907-F44       | 2014 | China | L8 |
| KP742986 | TJbd14-1         | 2014 | China | L8 |
| KP742987 | TJbd14-2         | 2014 | China | L8 |
| KP771735 | NVDC-SHH02-2014  | 2014 | China | L8 |
| KP771736 | NVDC-shh01-2014  | 2014 | China | L8 |
| KP771737 | NVDC-SD6-2014    | 2014 | China | L8 |
| KP771780 | NVDC-13SXJC-2014 | 2014 | China | L8 |
| KP771783 | NVDC-R224-2014   | 2014 | China | L8 |
| KP771784 | NVDC-SD4-2014    | 2014 | China | L8 |
| KP780881 | 14LY01-FJ        | 2014 | China | L8 |
| KP780882 | 14LY02-FJ        | 2014 | China | L8 |
| KT819203 | SCwhn14DY        | 2014 | China | L8 |
| KY373217 | SDZZ             | 2014 | China | L8 |
| KY373218 | SXF105           | 2014 | China | L8 |
| KY373216 | AHBZ             | 2014 | China | L8 |
| KP771739 | NVDC-SC1-2014    | 2014 | China | L8 |
| KP771781 | NVDC-HuNCS-2014  | 2014 | China | L8 |

|          |                |      |       |    |
|----------|----------------|------|-------|----|
| KT445876 | HNP5           | 2014 | China | L8 |
| KM261784 | HB2014001      | 2014 | China | L8 |
| KT022071 | HNxa14         | 2014 | China | L8 |
| MF669720 | GD1404         | 2014 | China | L8 |
| KP771738 | NVDC-SD1-2014  | 2014 | China | L8 |
| MN046221 | 2014-81        | 2014 | China | L8 |
| MN046227 | HeNXX-2014-9   | 2014 | China | L8 |
| MF124329 | GD1404         | 2014 | China | L8 |
| KP330232 | HUN-2014       | 2014 | China | L8 |
| MF669722 | ZJXS1412       | 2014 | China | L8 |
| KM000066 | NMG2014        | 2014 | China | L8 |
| KJ819935 | Henan-A13      | 2014 | China | L8 |
| KT257953 | 14-96          | 2014 | USA   | L8 |
| KT257950 | 14-79          | 2014 | USA   | L8 |
| KT257952 | 14-95          | 2014 | USA   | L8 |
| KT257948 | 14-76          | 2014 | USA   | L8 |
| KP771782 | NVDC-R38-2014  | 2014 | China | L8 |
| KU950375 | HENZZ-8        | 2015 | China | L8 |
| MF766472 | HeN1501        | 2015 | China | L8 |
| MF766473 | HeN1502        | 2015 | China | L8 |
| KT358728 | GZgy15-1       | 2015 | China | L8 |
| KX767091 | GSWW/CHA 2015  | 2015 | China | L8 |
| KX815407 | 15GD1          | 2015 | China | L8 |
| KX815408 | 15GD2          | 2015 | China | L8 |
| KX815409 | 15GD3          | 2015 | China | L8 |
| KX815410 | 15GD4          | 2015 | China | L8 |
| KX815414 | 15HEN3         | 2015 | China | L8 |
| KX815416 | 15HUN1         | 2015 | China | L8 |
| KX815417 | 15HUN2         | 2015 | China | L8 |
| KX815418 | 15HUN3         | 2015 | China | L8 |
| KX815424 | 15LN2          | 2015 | China | L8 |
| KX815429 | 15SN1          | 2015 | China | L8 |
| KX815430 | 15SN2          | 2015 | China | L8 |
| KX815431 | 15SN3          | 2015 | China | L8 |
| KX815412 | 15HEB3         | 2015 | China | L8 |
| KU950370 | HENPDS-2       | 2015 | China | L8 |
| KX815420 | 15JX2          | 2015 | China | L8 |
| KX815421 | 15JX3          | 2015 | China | L8 |
| KX815427 | 15SC2          | 2015 | China | L8 |
| KX815433 | 15ZJ2          | 2015 | China | L8 |
| KX815434 | 15ZJ3          | 2015 | China | L8 |
| KX815422 | 15JX4          | 2015 | China | L8 |
| KX815426 | 15SC1          | 2015 | China | L8 |
| MN046237 | InterMo-2015-2 | 2015 | China | L8 |

|          |                      |      |       |    |
|----------|----------------------|------|-------|----|
| MF669721 | HZL1501              | 2015 | China | L8 |
| MN073166 | PRR80785GJ-S21-L001  | 2015 | USA   | L8 |
| MN073167 | PRR80785GD-S22-L001  | 2015 | USA   | L8 |
| MN073181 | PRR80785             | 2015 | USA   | L8 |
| MN073153 | PRR715664-S10-L001   | 2015 | USA   | L8 |
| KY761966 | FZ16A                | 2016 | China | L8 |
| MF818049 | SC/NJ 2016           | 2016 | China | L8 |
| MH651747 | SDZC-1609            | 2016 | China | L8 |
| KX357708 | QTX                  | 2016 | China | L8 |
| KY290748 | HENXX-9              | 2016 | China | L8 |
| MN046234 | SDJM-1602            | 2016 | China | L8 |
| MN046238 | HN-1603              | 2016 | China | L8 |
| KX980393 | SDIz1601             | 2016 | China | L8 |
| MF526896 | GDQYQC2              | 2016 | China | L8 |
| MN073168 | 562482PRRS-S4-L001   | 2016 | USA   | L8 |
| MN073155 | PRR3-S3-L001         | 2016 | USA   | L8 |
| MH404256 | SD17                 | 2017 | China | L8 |
| MF770574 | 17-ZJ-HZ             | 2017 | China | L8 |
| MN046231 | Anhui-2017-109       | 2017 | China | L8 |
| MN046235 | Gansu-2017-51        | 2017 | China | L8 |
| MN046236 | Sichuan-2017-117     | 2017 | China | L8 |
| MK759853 | XJ17-5               | 2017 | China | L8 |
| MK906026 | JSTZ1712-12          | 2017 | China | L8 |
| MH663433 | HNRZ                 | 2017 | China | L8 |
| MN073156 | PRRSV-2017083451-S10 | 2017 | USA   | L8 |
| MN073158 | 2017021039-S12-L001  | 2017 | USA   | L8 |
| MN073159 | lung249621-S5-L001   | 2017 | USA   | L8 |
| MN073161 | 9985R-S8-L001        | 2017 | USA   | L8 |
| MN073162 | 9981R-S4-L001        | 2017 | USA   | L8 |
| MN073164 | serum24962-S7-L001   | 2017 | USA   | L8 |
| MN073165 | 9983R-S6-L001        | 2017 | USA   | L8 |
| MN073169 | 6660R-S5-L001        | 2017 | USA   | L8 |
| MN073170 | 9986R-S9-L001        | 2017 | USA   | L8 |
| MN073171 | 9987R-S10-L001       | 2017 | USA   | L8 |
| MN046223 | HLJ-DZD1-1804        | 2018 | China | L8 |
| MN046232 | JS3-1805             | 2018 | China | L8 |
| MN046239 | HLJ-YC8              | 2018 | China | L8 |
| MK450365 | CH-YY                | 2018 | China | L8 |
| MN073157 | 3451R-S10-L001       | 2018 | USA   | L8 |
| MK796165 | IA70388-R            | 2018 | USA   | L8 |
| EF635006 | HUN4                 | na   | China | L8 |
| FJ394029 | 07QN                 | na   | China | L8 |
| KT804696 | FJYR                 | na   | China | L8 |
| EF112445 | JXA1                 | na   | China | L8 |



|          |           |    |       |    |
|----------|-----------|----|-------|----|
| EF112446 | HUB2      | na | China | L8 |
| EF112447 | HEB1      | na | China | L8 |
| EF517962 | HuN       | na | China | L8 |
| EU097706 | NX06      | na | China | L8 |
| EU097707 | BJsy06    | na | China | L8 |
| EU106888 | SHH       | na | China | L8 |
| EU109502 | LN        | na | China | L8 |
| EU109503 | GD-109503 | na | China | L8 |
| EU200961 | Jiangxi-3 | na | China | L8 |
| EU200962 | Henan-1   | na | China | L8 |
| EU236259 | HPBEDV    | na | na    | L8 |
| EU678352 | WUH2      | na | China | L8 |
| FJ548854 | JXA1-P10  | na | China | L8 |
| FJ548855 | JXA1-P15  | na | China | L8 |
| GQ475526 | JXM100    | na | China | L8 |
| GQ857656 | SX-1      | na | China | L8 |
| HM214913 | GX09-16   | na | China | L8 |
| HM214914 | GX09-29   | na | China | L8 |
| HM214915 | GX09-32   | na | China | L8 |
| JQ309822 | GX10-42   | na | China | L8 |
| KP998475 | FJE1      | na | China | L8 |
| KP998479 | FJOU      | na | China | L8 |
| KR149645 | JXja15    | na | China | L8 |
| KU215417 | 15LY02-FJ | na | China | L8 |
| KY488470 | GDJM      | na | China | L8 |
| KY488471 | GDGZ      | na | China | L8 |
| KY488473 | GDZQ      | na | China | L8 |
| KY488474 | HNHK2     | na | China | L8 |
| KY488475 | HNHK1     | na | China | L8 |
| KY488476 | GDHY      | na | China | L8 |
| KY488477 | GDHZ      | na | China | L8 |
| KY488478 | GDQY      | na | China | L8 |
| KY488479 | GD SG     | na | China | L8 |
| KY498542 | GDST      | na | China | L8 |
| EU187484 | WUH1      | na | China | L8 |
| KU215416 | 15LY01-FJ | na | China | L8 |
| EF075945 | HUB1      | na | China | L8 |
| JQ309823 | GX10-48   | na | China | L8 |
| FJ548851 | JXA1-P45  | na | China | L8 |
| FJ548852 | JXA1-P70  | na | China | L8 |
| FJ548853 | JXA1-P80  | na | China | L8 |
| JQ955657 | GX1001    | na | China | L8 |
| KP998477 | FJCH      | na | China | L8 |
| KP998478 | FJZH      | na | China | L8 |

|          |              |      |       |    |
|----------|--------------|------|-------|----|
| JQ955658 | GX1002       | na   | China | L8 |
| KY488472 | GDMM         | na   | China | L8 |
| EU262603 | Em2007       | na   | China | L8 |
| GQ330474 | APRRS        | na   | China | L8 |
| AY032626 | CH-1a        | na   | China | L8 |
| EU880438 | CH2002       | na   | China | L8 |
| EU880439 | CH2004       | na   | China | L8 |
| EU880440 | CH2003       | na   | China | L8 |
| KX510269 | TJnh1501     | na   | China | L8 |
| MF772778 | GDzj         | na   | China | L8 |
| AY424271 | JA142        | na   | na    | L8 |
| DQ988080 | Ingelvac ATP | na   | USA   | L8 |
| AY545985 | NVSL_97-7895 | na   | USA   | L8 |
| KU131565 | SD95-10_P83  | 1995 | USA   | L9 |
| KY348847 | 1692-98      | 1998 | USA   | L9 |
| KU131563 | SD98-163_P83 | 1998 | USA   | L9 |
| KY348852 | 46517-00     | 2000 | USA   | L9 |
| KY348850 | 21599-00     | 2000 | USA   | L9 |
| HQ699067 | NC16845      | 2006 | USA   | L9 |
