# Supplementary material for: A Novel Motif in the 3′-UTR of PRRSV-2 Is Critical for Viral Multiplication and Contributes to Enhanced Replication Ability of Highly Pathogenic or L1 PRRSV
Source: MDPI journal article supplement (doi:10.3390/v14020166), 2022-01-18
Supplement: s1 [file s1]

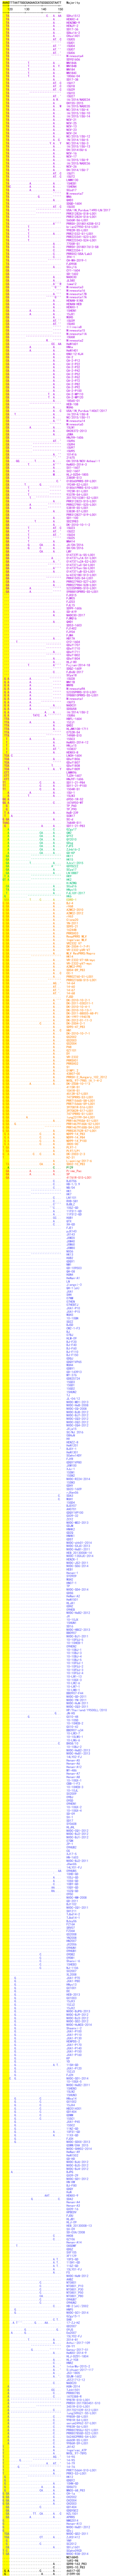

Lineage 1 NADC30-like PRRSV

Lineage 3 QYYZ-like PRRSV  
Lineage 4 EDRD-1-like PRRSV

Lineage 5 VR-2332-like PRRSV

Lineage 6 P129-like PRRSV  
Lineage 7 SP-like PRRSV

Lineage 8 HP-PRRSV and CH-1a-like PRRSV

Lineage 9 NC16845-like PRRSV
