# Supplementary figures and images for: A Novel Motif in the 3′-UTR of PRRSV-2 Is Critical for Viral Multiplication and Contributes to Enhanced Replication Ability of Highly Pathogenic or L1 PRRSV
Source: MDPI journal article supplement (doi:10.3390/v14020166), 2022-01-18

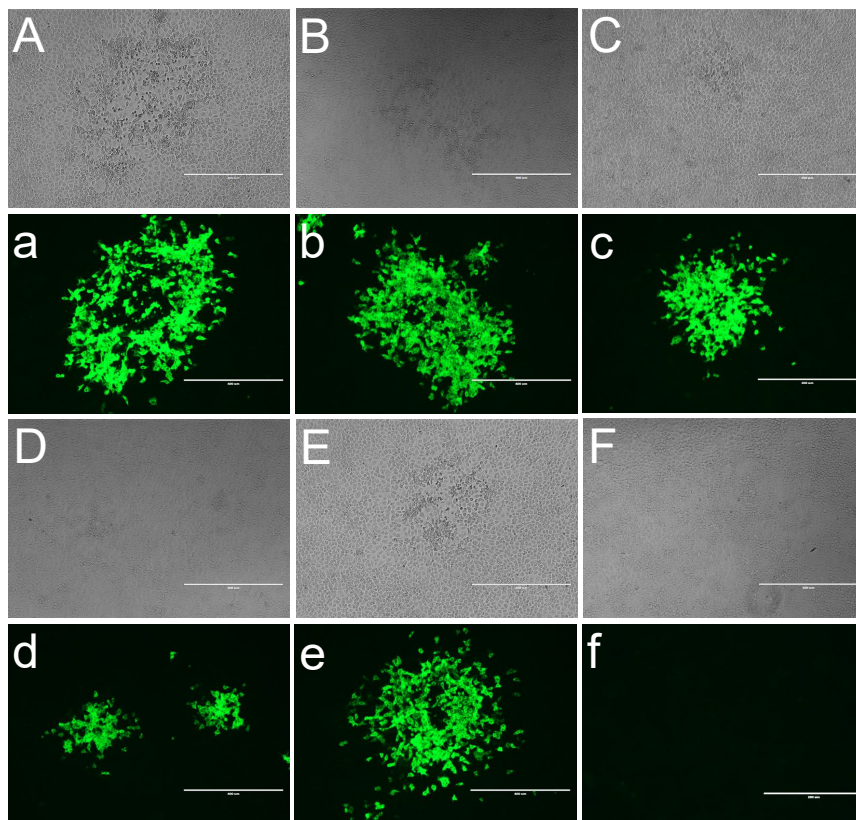

G

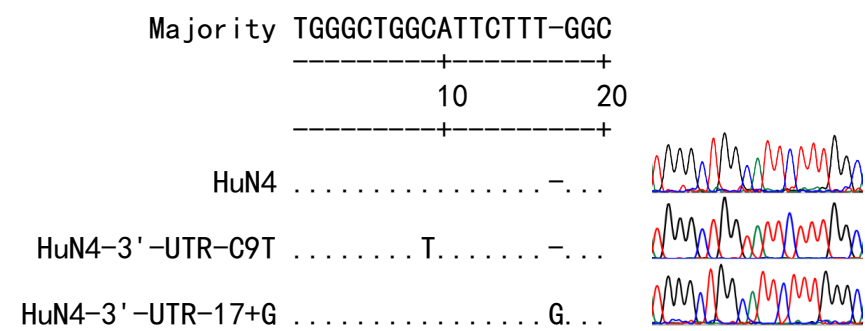

H

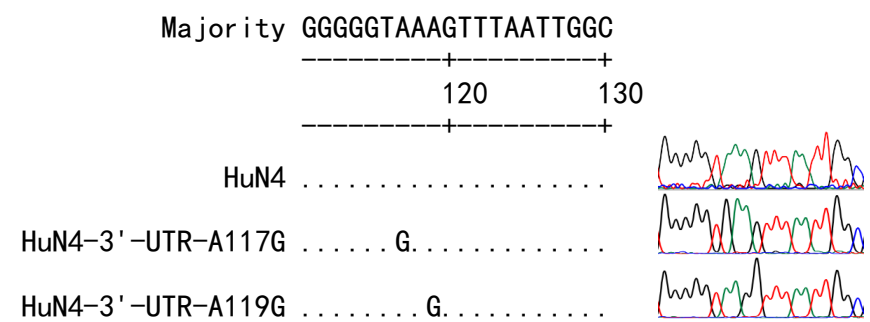

Supplement: s1 [file s1]

A

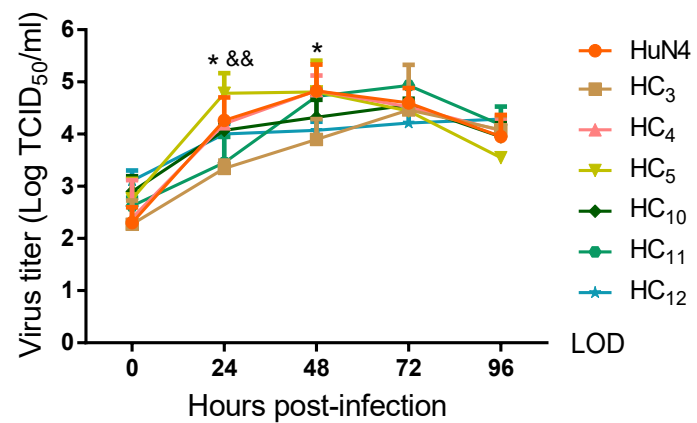

B

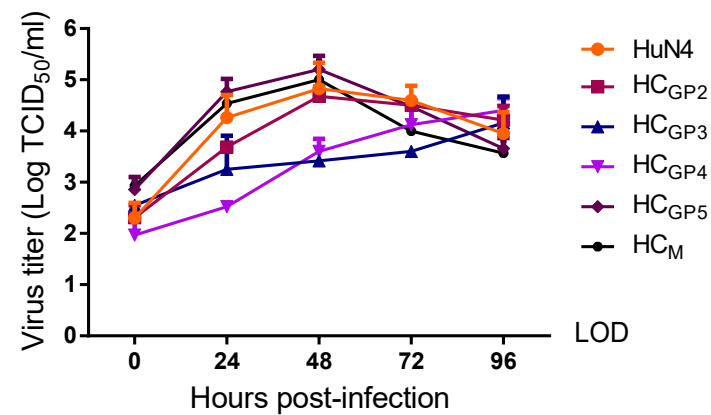

C

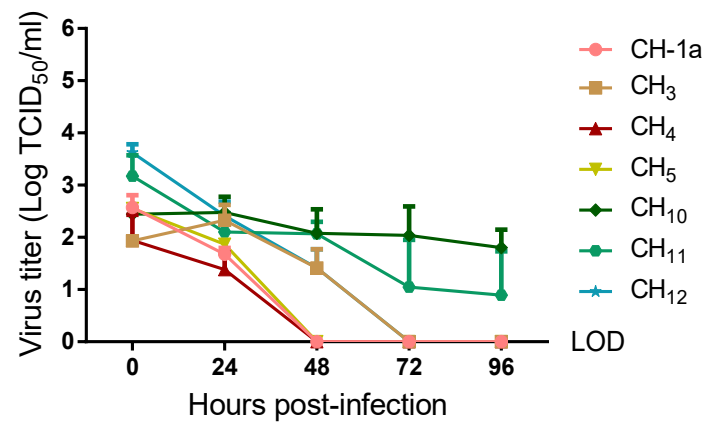

D

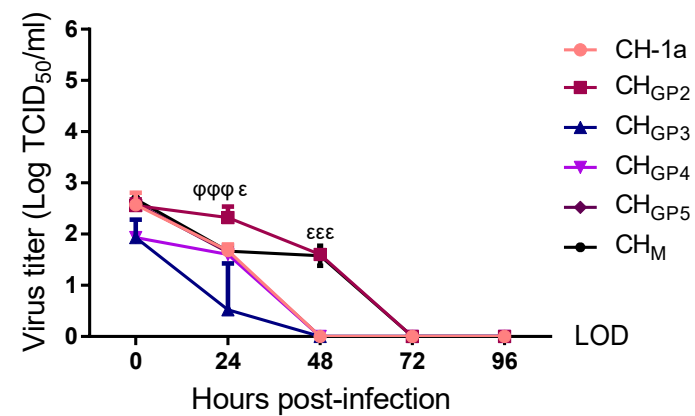

Supplement: s1 [file s1]
